# Supplementary material
Source: ML conference proceedings conference paper supplement (https://proceedings.neurips.cc/paper_files/paper/2015/hash/6855456e2fe46a9d49d3d3af4f57443d-Abstract.html)
Supplement: Supplementary file 1 [file 6855456e2fe46a9d49d3d3af4f57443d-Supplemental.zip]

Archive with 1 entries (1 files):
- nips2013_supplementary.pdf
